# Supplementary material for: Smartphone-based surface plasmon resonance sensing platform for rapid detection of bacteria
Source: Royal Society of Chemistry journal article supplement (doi:10.1039/d2ra01788a), 2022-01-01
Supplement: d2ra01788a1.pdf [file d2ra01788a1.pdf]

# **Smartphone-based Surface Plasmon Resonance Sensing Platform for Rapid Detection of Bacteria**

Junlin Wen<sup>\*a</sup>, Yufan Zhu<sup>a</sup>, Jianbo Liu<sup>a</sup> and Daigui He<sup>\*b</sup>

<sup>a</sup> School of Environmental Science and Engineering, Guangdong University of Technology,

Guangzhou 510006, P. R. China.

<sup>b</sup> College of Artificial Intelligence, Guangdong Mechanical & Electrical Polytechnic, Guangzhou

510550, P. R. China.

\* Corresponding author:

Tel. and fax: +86-20-36552429.

E-mail: jlwen@gdut.edu.cn (J. Wen); hedaigui@gdmec.edu.cn (D. He)

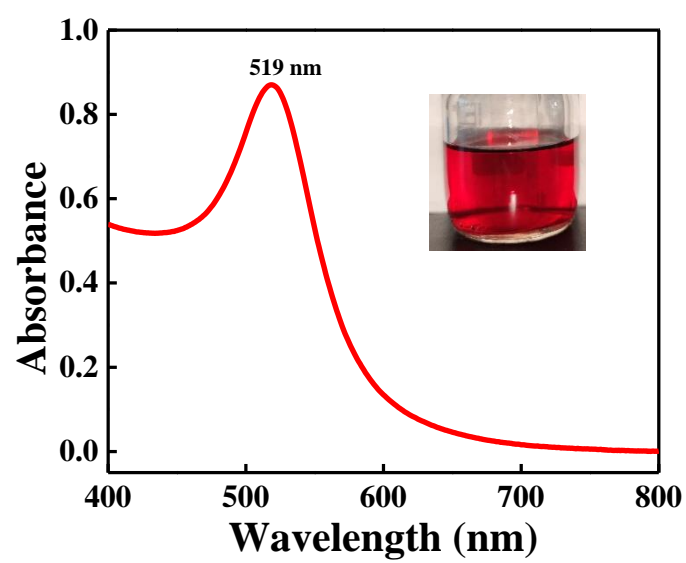

**Figure S1** UV-VIS spectrum of the prepared AuNPs colloid.

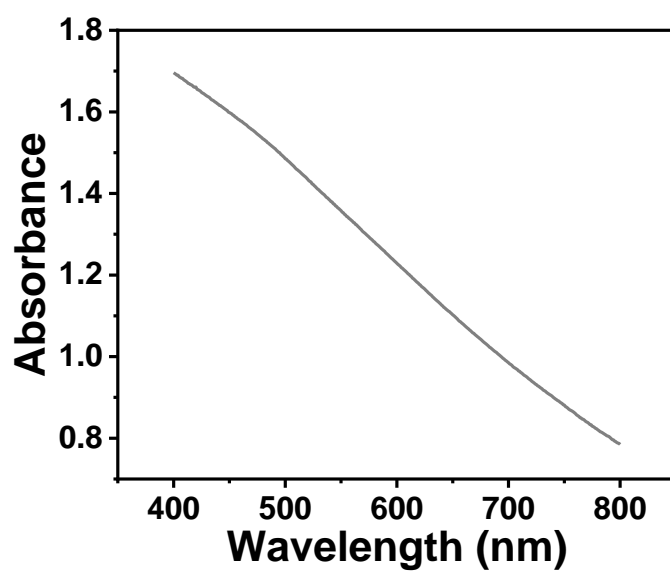

**Figure S2** UV-VIS spectrum of the dead *E. coli* suspended in ultrapure water.

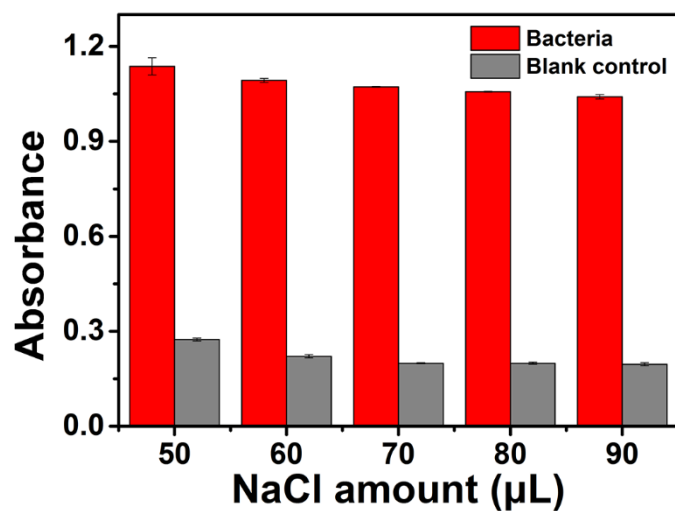

**Figure S3** Influence of NaCl amount on the responsive color signal. The signal was recorded in the presence of 700 μL of AuNPs and 700 μL of bacteria suspension with OD600 equal to 1.0. The initial concentration of NaCl solution is 1.0 mol/L.

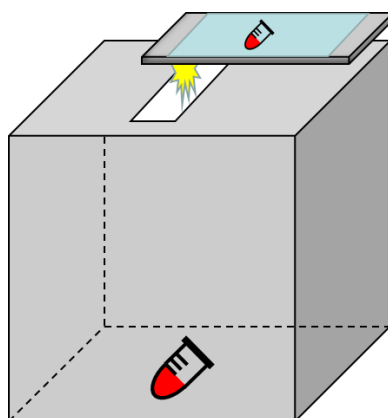

**Figure S4** Illustration of smartphone-based imaging of bacteria/AuNPs color development.

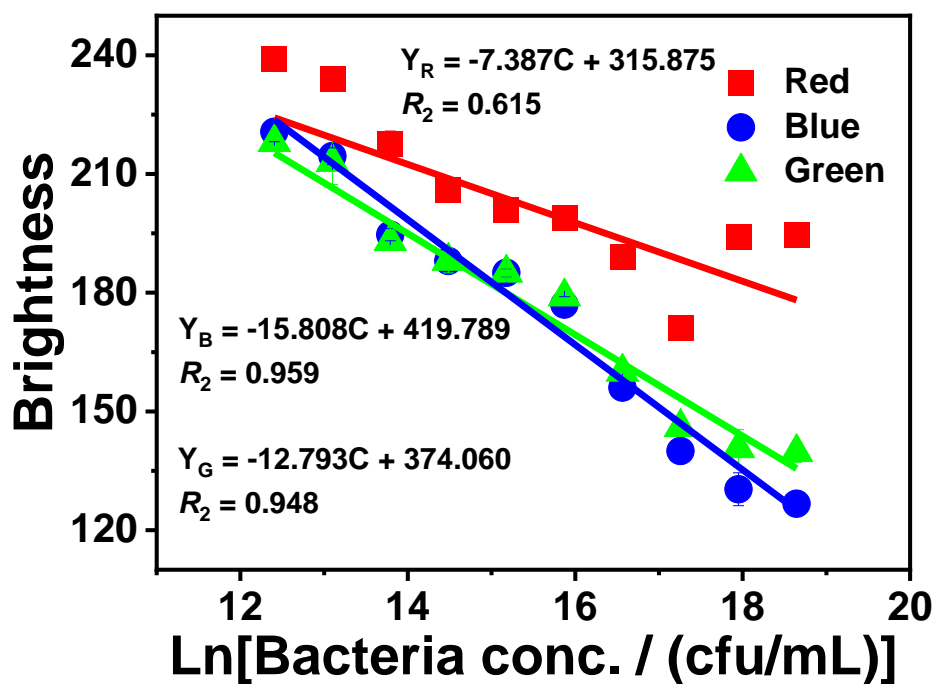

**Figure S5** GRB signal of color-developed bacteria/AuNPs obtained with smartphone APP.

**Table S1** Recovery of proposed sensing method in measuring bacteria-spiked water

samples

| Sample         | Spiked bacteria<br>(cfu/mL) | Recovery (%) | SD (%) |
|----------------|-----------------------------|--------------|--------|
| Tap water      | $5.0 \times 10^8$           | 95.4         | 3.75   |
| Drinking water | $5.0 \times 10^8$           | 85.7         | 4.66   |
| Lake water     | $5.0 \times 10^8$           | 86.2         | 4.83   |
